# Supplementary material for: Excited state hydrogen transfer dynamics in phenol–(NH3)2 studied by picosecond UV-near IR-UV time-resolved spectroscopy
Source: Royal Society of Chemistry journal article supplement (doi:10.1039/c9cp06369b), 2020-01-01
Supplement: c9cp06369b1.pdf [file c9cp06369b1.pdf]

## Electronic Supplementary Information

### Excited state hydrogen transfer dynamics in phenol-(NH<sub>3</sub>)<sub>2</sub> studied by picosecond UV-near IR-UV time-resolved spectroscopy

Shun-ichi Ishiuchi<sup>a</sup>), Junko Kamizori<sup>a</sup>), Norihiro Tsuji<sup>a</sup>), Makoto Sakai<sup>a</sup>)<sup>†</sup>, Mitsuhiro Miyazaki<sup>a</sup>)<sup>#\*</sup>, Claude Dedonder<sup>c</sup>), Christophe Jouvét<sup>b, c</sup>)<sup>\*</sup>, and Masaaki Fujii<sup>a, b</sup>)<sup>\*</sup>

<sup>a</sup>Laboratory for Chemistry and Life Science, Institute of Innovative Research, Tokyo Institute of Technology, 4259-R1-15, Nagatsuta-cho, Midori-ku, Yokohama 226-8503, Japan.

<sup>b</sup>World Research Hub Initiatives, Institute of Innovative Research, Tokyo Institute of Technology, 4259-R1-15, Nagatsuta-cho, Midori-ku, Yokohama 226-8503, Japan.

<sup>c</sup>CNRS, Aix Marseille Université, Physique des Interactions Ioniques et Moléculaires (PIIM) UMR 7345, 13397 Marseille cedex, France.

<sup>†</sup>present address: Department of Chemistry, Faculty of Science, Okayama University of Science, 1-1 Ridaicho, Kita-ku, Okayama-shi 700-0005, Japan.

<sup>#</sup>present address: Department of Chemistry, Faculty of Science, Ochanomizu University, 2-1-1 Ohtsuka, Bunkyo-ku, Tokyo, 112-8610, Japan.

Corresponding authors: MM (miyazaki.mitsuhiro@ocha.ac.jp), CJ (christophe.jouvet@univ-amu.fr), and MF (mfujii@res.titech.ac.jp)

## Contents

1. Solution of the differential equation for the proposed reaction scheme

☒☒ Solution of the differential equation for the proposed reaction scheme

Here we define amounts of species concerning to the ESHT reaction of the PhOH-(NH<sub>3</sub>)<sub>2</sub> cluster as follows,

$$[R] \equiv [PhOH^* - (NH_3)_2](t),$$

$$[P] \equiv [\cdot NH_4NH_3](t),$$

$$[X] \equiv [Intermediate, X](t).$$

When the ESHT reaction proceeds according to the reaction scheme proposed in the main text, time-changes in the related species are represented by the following differential equations:

$$\frac{d[R]}{dt} = -(k_1 + k_2)[R] \quad (S1),$$

$$\frac{d[X]}{dt} = k_2[R] - k_3[X] \quad (S2),$$

$$\frac{d[P]}{dt} = k_1[R] + k_3[X] \quad (S3).$$

The Laplace transformation of equation (S1)–(S3) transforms them into equations (S4)–(S6) as follows:

$$sL\{[R]\} - [R]_0 = -(k_1 + k_2)L\{[R]\} \quad (S4),$$

$$sL\{[X]\} - [X]_0 = k_2L\{[R]\} - k_3L\{[X]\} \quad (S5),$$

$$sL\{[P]\} - [P]_0 = k_1L\{[R]\} + k_3L\{[X]\} \quad (S6),$$

where  $L\{[\Omega]\}$  and  $[\Omega]_0$  represent the Laplace transformation and initial amount of  $[\Omega]$ , respectively. Since  $[X]_0 = 0$  and  $[P]_0 = 0$ , the equations (S4)–(S5) reduce to

$$sL\{[R]\} - [R]_0 = -(k_1 + k_2)L\{[R]\} \quad (S4)',$$

$$sL\{[X]\} = k_2L\{[R]\} - k_3L\{[X]\} \quad (S5)',$$

$$sL\{[P]\} = k_1L\{[R]\} + k_3L\{[X]\} \quad (S6)'.$$

The equations (S4)'–(S6)' can be solved about  $L\{[\Omega]\}$  as follows:

$$L\{[R]\} = \frac{[R]_0}{(k_1 + k_2 + s)} \quad (S7),$$

$$L\{[X]\} = \frac{k_2[R]_0}{(k_1 + k_2 + s)(k_3 + s)} \quad (S8),$$

$$L\{[P]\} = \frac{((k_1 + k_2)k_3 + k_1s)k_2[R]_0}{s(k_1 + k_2 + s)(k_3 + s)} \quad (S9).$$

Partial fraction decomposition of equations (S7)–(S9) gives:

$$L\{[R]\} = \frac{[R]_0}{(k_1 + k_2 + s)} \quad (S7)',$$

$$L\{[X]\} = \frac{k_2[R]_0}{(k_1 + k_2 - k_3) \left( \frac{1}{(k_3 + s)} - \frac{1}{(k_1 + k_2 + s)} \right)} \quad (S8)',$$

$$L\{[P]\} = [R]_0 \left( \frac{1}{s} - \frac{(k_1 - k_3)k_2}{(k_1 + k_2 - k_3)(k_1 + k_2 + s)} - \frac{k_2}{(k_1 + k_2 - k_3)(k_3 + s)} \right) \quad (S9)'.$$

The inverse Laplace transformation of equations (S7)'–(S9)' recovers  $[\Omega]$  as follows:

$$[R] = [R]_0 e^{-(k_1 + k_2)t} \quad (S10),$$

$$[X] = [R]_0 \frac{k_2}{(k_1 + k_2 - k_3)} (e^{-k_3 t} - e^{-(k_1 + k_2)t}) \quad (S11),$$

$$[P] = [R]_0 \left( \frac{k_1 - k_3}{k_1 + k_2 - k_3} (1 - e^{-(k_1 + k_2)t}) + \frac{k_2}{k_1 + k_2 - k_3} (1 - e^{-k_3 t}) \right) \quad (S12).$$

Thus, the time evolutions are expressed in double exponential functions. The equation (S12) is used as the equation (1) in the main text, where  $[R]_0$  is replaced by  $A$  to change the absolute amount of  $[R]_0$  to the signal intensity. In the fitting procedure, convoluted forms of the functions by a Gaussian function that represents the instrumental function were used.
